# Supplementary material for: Synergistic contributions by decreasing overpotential and enhancing charge-transfer in α-Fe2O3/Mn3O4/graphene catalysts with heterostructures for photocatalytic water oxidation
Source: Royal Society of Chemistry journal article supplement (doi:10.1039/c4cp00384e), 2014-01-01

**Electronic Supplementary Information (ESI)**

**Synergistic contributions by decreasing overpotential and enhancing charge-transfer in  $\alpha$ -Fe<sub>2</sub>O<sub>3</sub>/Mn<sub>3</sub>O<sub>4</sub>/graphene catalysts with heterostructures for photocatalytic water oxidation**

Shunli Yin<sup>a</sup>, Xiaomei Wang<sup>b</sup>, Zhigang Mou<sup>a</sup>, Yijie Wu<sup>a</sup>, Hui Huang<sup>a</sup>, Mingshan Zhu<sup>c</sup>, Yukou Du<sup>a</sup>,  
Ping Yang<sup>\*a</sup>

<sup>a</sup>. College of Chemistry, Chemical Engineering and Materials Science, Soochow University, Suzhou 215123, <sup>b</sup>. College of Chemistry and Bioengineering, Suzhou University of Science and Technology, Suzhou 215011, <sup>c</sup>. CAS Key Laboratory of Colloid, Interface and Chemical Thermodynamics Institute of Chemistry, Chinese Academy of Sciences, Beijing 100190, China

E-mail address: [pyang@suda.edu.cn](mailto:pyang@suda.edu.cn)

**Supporting information table of contents:**

**Fig. S1** Fourier transform infrared (FTIR) spectra of (a) r-GO and (b)  $\alpha$ -Fe<sub>2</sub>O<sub>3</sub>/Mn<sub>3</sub>O<sub>4</sub>-1/r-GO-3 nanocomposite.

**Fig. S2** Raman spectra of (a) r-GO and (b)  $\alpha$ -Fe<sub>2</sub>O<sub>3</sub>/Mn<sub>3</sub>O<sub>4</sub>-1/r-GO-3 nanocomposite.

**Fig. S3** SEM images of (A)  $\alpha$ -Fe<sub>2</sub>O<sub>3</sub> and (B)  $\alpha$ -Fe<sub>2</sub>O<sub>3</sub> calcined under 400 °C.

**Fig. S1** Fourier transform infrared (FTIR) spectra of (a) r-GO and (b)  $\alpha$ -Fe<sub>2</sub>O<sub>3</sub>/Mn<sub>3</sub>O<sub>4</sub>-1/r-GO-3 nanocomposite.

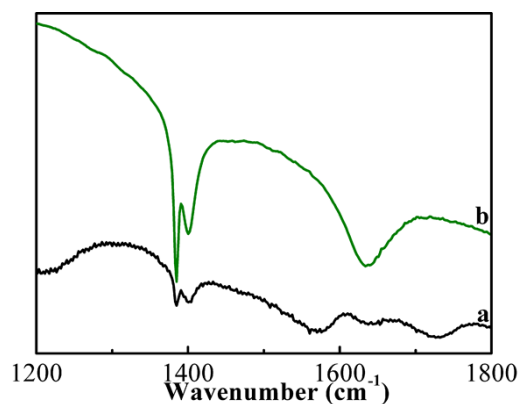

**Fig. S2** Raman spectra of (a) r-GO and (b)  $\alpha$ -Fe<sub>2</sub>O<sub>3</sub>/Mn<sub>3</sub>O<sub>4</sub>-1/r-GO-3 nanocomposite.

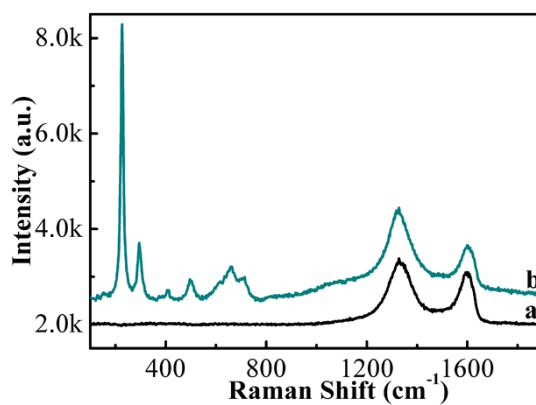

**Fig. S3** SEM images of (A)  $\alpha$ -Fe<sub>2</sub>O<sub>3</sub> and (B)  $\alpha$ -Fe<sub>2</sub>O<sub>3</sub> calcined under 400 °C.

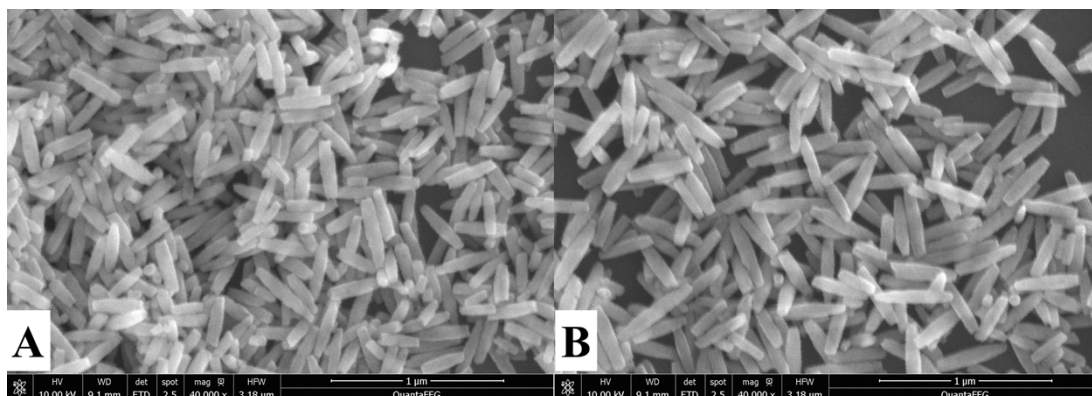

Supplement: c4cp00384e1.pdf [file c4cp00384e1.pdf]
